# Supplementary material
Source: PubMed Central journal article supplement (PMC2722305)
Supplement: 0901123106_0901123106SI.pdf [file 0901123106_0901123106SI.pdf]

# Supporting Information

Hornickel et al. 10.1073/pnas.0901123106

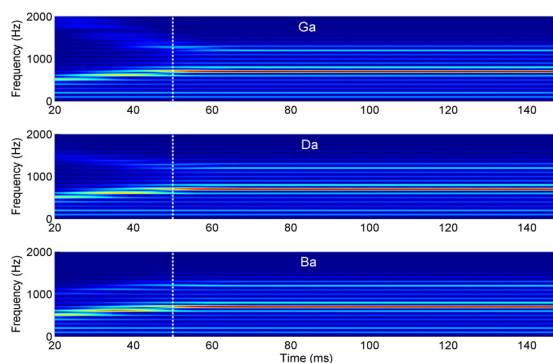

**Fig. S1.** Stimulus spectrograms. Spectrograms of the [ga], [da], and [ba] stimuli are plotted. The 3 stimuli differ on the second formant trajectory during the formant transition period and are identical during the vowel portion (boundary marked by the dashed white line).  $F_2$  decreases in the [ga] stimulus from 2,480 Hz and in the [da] stimulus from 1,700 Hz and increases in the [ba] stimulus from 900 Hz, reaching a steady-state of 1,240 Hz in all 3 stimuli. The spectrograms are generated with a 40-ms window analysis, and the midpoint of each window is plotted.

**Table S1. Means (SD) of behavioral measures for children grouped 3 different ways: (i) with and without learning experiments (n = 23 and 20, respectively), (ii) good and poor phonological awareness (n = 14 each), and (iii) speech-in-noise perception (n = 14 each) as defined by study measures**

| Behavioral Measure                      | Normal Learning | Learning Impaired | Good Phonological Awareness | Poor Phonological Awareness | Good Speech-in-Noise Perception | Poor Speech-in-Noise Perception |
|-----------------------------------------|-----------------|-------------------|-----------------------------|-----------------------------|---------------------------------|---------------------------------|
| Phonological Awareness                  | 108.1 (11.2)    | 97.0 (13.6)       | 116.3 (3.3)                 | 85.9 (7.0)                  | 105.4 (14.0)                    | 101.7 (13.6)                    |
| Phonological Memory                     | 110.1 (14.5)    | 94.4 (12.7)       | 112.0 (14.0)                | 94.2 (11.1)                 | 102.1 (14.1)                    | 101.5 (18.2)                    |
| Rapid Naming                            | 105.4 (12.9)    | 87.6 (12.8)       | 99.8 (15.5)                 | 87.4 (13.9)                 | 98.9 (16.2)                     | 102.1 (12.1)                    |
| Test of Word Reading Efficiency-Sight   | 115.9 (8.5)     | 87.7 (11.4)       | 108.4 (13.8)                | 87.9 (13.2)                 | 106.4 (17.7)                    | 102.5 (17.2)                    |
| Test of Word Reading Efficiency-Phoneme | 117.2 (11.9)    | 92.8 (11.6)       | 112.9 (13.5)                | 90.6 (11.1)                 | 109.2 (17.6)                    | 106.1 (17.7)                    |
| Test of Silent Word Reading Fluency     | 109.1 (12.1)    | 88.8 (11.3)       | 111.4 (14.3)                | 86.86 (10.5)                | 103.6 (16.7)                    | 98.6 (15.8)                     |
| Hearing in Noise Test-Front             | 65.0 (31.3)     | 50.1 (33.8)       | 57.5 (34.2)                 | 62.7 (28.0)                 | 67.9 (26.4)                     | 45.5 (39.5)                     |
| Hearing in Noise Test-Right             | 38.3 (23.5)     | 26.3 (18.6)       | 43.9 (21.7)                 | 33.1 (12.9)                 | 57.4 (14.2)                     | 10.0 (5.9)                      |
| Hearing in Noise Test-Left              | 44.1 (35.3)     | 27.0 (26.9)       | 40.8 (33.2)                 | 29.7 (23.1)                 | 35.4 (28.0)                     | 25.7 (35.1)                     |
| Hearing in Noise Test-Composite         | 52.0 (26.9)     | 29.4 (21.4)       | 49.0 (29.8)                 | 39.3 (14.8)                 | 57.7 (19.6)                     | 20.2 (21.3)                     |
